1                    Multi-Method Characterisation of the Human Circulating Microbiome

2  
3                    **E. Whittle<sup>1</sup>, M.O. Leonard<sup>2</sup>, R. Harrison<sup>1</sup>, T.W. Gant<sup>2</sup> and D.P Tonge<sup>1</sup>**

4  
5                    <sup>1</sup>School of Life Sciences, Faculty of Natural Sciences, Keele University, ST5 5BG <sup>2</sup>  
6                    Centre for Radiation, Chemical and Environmental Hazards, Public Health  
7                    England, OX11 0RQ

8  
9                    **Abstract**

10                    The term microbiome describes the genetic material encoding the various microbial  
11                    populations that inhabit our body. Whilst colonisation of various body niches (e.g. the  
12                    gut) by dynamic communities of microorganisms is now universally accepted, the  
13                    existence of microbial populations in other “classically sterile” locations, including the  
14                    blood, is a relatively new concept. The presence of bacteria-specific DNA in the  
15                    blood has been reported in the literature for some time, yet the true origin of this is  
16                    still the subject of much deliberation. The aim of this study was to investigate the  
17                    phenomenon of a “blood microbiome” by providing a comprehensive description of  
18                    bacterially-derived nucleic acids using a range of complementary molecular and  
19                    classical microbiological techniques. For this purpose we utilised a set of plasma  
20                    samples from healthy subjects (n = 5) and asthmatic subjects (n = 5). DNA-level  
21                    analyses involved the amplification and sequencing of the 16S rRNA gene. RNA-  
22                    level analyses were based upon the *de novo* assembly of unmapped mRNA reads  
23                    and subsequent taxonomic identification. Molecular studies were complemented by  
24                    viability data from classical aerobic and anaerobic microbial culture experiments. At  
25                    the phylum level, the blood microbiome was predominated by Proteobacteria,  
26                    Actinobacteria, Firmicutes and Bacteroidetes. The key phyla detected were  
27                    consistent irrespective of molecular method (DNA vs RNA), and consistent with the  
28                    results of other published studies. *In silico* comparison of our data with that of the  
29                    Human Microbiome Project revealed that members of the blood microbiome were  
30                    most likely to have originated from the oral or skin communities. To our surprise,  
31                    aerobic and anaerobic cultures were positive in eight of out the ten donor samples  
32                    investigated, and we reflect upon their source. Our data provide further evidence of a  
33                    core blood microbiome, and provide insight into the potential source of the bacterial  
34                    DNA / RNA detected in the blood. Further, data reveal the importance of robust  
35                    experimental procedures, and identify areas for future consideration.

36  
37  
38

## 39 Background

40 The term “microbiome” describes the genetic material encoding the various microbial  
41 populations that inhabit our body. In contrast, the term “microbiota” refers to the  
42 viable organisms that comprise these communities. Cell for cell, bacterial cells  
43 outnumber our own cells by a factor of ten, and the bacterial microbiome encodes for  
44 one hundred-fold more genes. The microbiome undertakes essential biological  
45 processes and thus it is unsurprising that a number of disease states are associated  
46 with changes in microbiome composition, termed “dysbiosis”. Whilst the colonisation  
47 of specific body sites in contact with the external environment (such as the  
48 gastrointestinal tract, skin and vagina) by microorganisms is both well-described and  
49 universally accepted <sup>1</sup>, the existence of microbial populations in other “classically  
50 sterile” locations, including the blood, is a relatively new concept.

51  
52 The presence of bacteria-specific DNA in the blood has been reported in the  
53 literature for some time, yet the true origin of this is still the subject of much  
54 deliberation. Mounting evidence supports the existence of a blood microbiome  
55 (*specifically, the presence of bacterial genetic material*) in humans <sup>2-11</sup> and various  
56 other species, including rodents, cats, chickens and cows <sup>12-15</sup>. This has primarily  
57 been determined by amplification and sequencing of the bacterial 16S rRNA gene, or  
58 via whole genome sequencing. Such studies report the existence of bacteria-derived  
59 genetic material (DNA) within the circulation, but do not provide evidence for the  
60 presence of viable organisms.

61  
62 Convention tells us that the blood is sterile in health, and bacteraemia, even at 1 –  
63 10 bacterial cells per millilitre whole blood, is potentially life threatening. Despite  
64 this, several studies have presented evidence of bacteria or bacteria-like structures  
65 within the circulation in the absence of overt disease. It should be noted however  
66 that Martel and colleagues report that the bacteria-like particles often described  
67 following a range of imaging techniques represent non-living membrane vesicles and  
68 protein aggregates derived from the blood itself <sup>16</sup>. McLaughlin surveyed the blood of  
69 25 healthy donors and observed the presence of pleomorphic bacteria using dark-  
70 field microscopy, electron microscopy, polymerase chain reaction and fluorescent *in*  
71 *situ* hybridisation, in all samples analysed <sup>17</sup>. Further, Potgieter and colleagues  
72 described the presence of blood-cell associated bacteria in a range of blood  
73 preparations using electron microscopic techniques <sup>8</sup>. Significantly, Damgaard and  
74 colleagues found viable (*culturable*) bacteria in 62% of blood donations from donors  
75 with no overt disease <sup>18</sup>. This finding is plausible given that various daily activities  
76 including chewing, tooth brushing and flossing result in the translocation of oral  
77 bacteria into the bloodstream <sup>19-22</sup>, however one would expect such organisms to be  
78 rapidly targeted and removed with by the immune system in healthy individuals. Kell  
79 and colleagues provide a detailed hypothesis for the existence of the blood  
80 microbiome <sup>4,8</sup> and suggest that it is likely composed of organisms (or parts thereof)  
81 that translocate to the circulation from their usual place of habitation (classical niches  
82 such as the gastrointestinal tract, oral cavity, skin, vagina) – a process termed  
83 atopobiosis. They further describe how this could occur via well-described  
84 physiological processes including dendritic cells processes, via micro-fold cells, and  
85 in disease, via dysfunctional epithelial junctions. This explanation is supported by  
86 studies demonstrating a correlation between gut microbiota dysbiosis and altered  
87 microbial signatures detected in the blood <sup>23-25</sup>, suggesting that the observed

88 disease-associated blood microbiota is a consequence of increased bacterial  
89 translocation across the gut barrier. Furthermore, characterisation of the microbial  
90 populations in the coronary artery tissues by Lehtiniemi and colleagues<sup>26</sup> identified  
91 known members of the oral microbiota, suggesting that bacteria had translocated  
92 from the oral cavities into the bloodstream, potentially as a result of damage caused  
93 by tooth brushing or by leakage across the mucosal surfaces.

94  
95 Various disease states are associated with blood microbiome dysbiosis<sup>2,6,24,25,27</sup>,  
96 and these changes are likely reflective of dysbiosis at a distant site(s) with well-  
97 characterised microbial communities, and the result of subsequent translocation.  
98 Limited evidence also suggests that these changes may be disease-specific;  
99 Alzheimer's disease for example, has been associated with the detection of mostly  
100 coccus microbes, whilst Parkinson's disease has been associated with both coccus  
101 and bacillus bacteria<sup>8</sup>. Such changes are of significant scientific and medical interest  
102 as they offer opportunities for biomarker and therapeutic target development<sup>25,27</sup>.

103  
104 Due to the long-held belief that the bloodstream of healthy individuals is sterile and  
105 since the blood is an unfavourable compartment for the microbes due to its  
106 bacteriostatic and bactericidal components<sup>1,13</sup>, it is of principal significance to  
107 understand *whether* and *how* bacteria may persist in it. Accidental contamination  
108 during the collection of blood and or during downstream experimental procedures  
109 has been proposed as an alternative explanation for the existence of the blood  
110 microbiome *per se*. We support this explanation for the detection of *viable* bacteria  
111 within the bloodstream of healthy individuals, however, suggest that this  
112 phenomenon does not adequately explain the existence of the blood microbiome  
113 (*the presence of bacteria-derived nucleic acids*) when one considers the number of  
114 studies that demonstrate significant and apparently disease-specific differences in  
115 the composition of the blood microbiome. Moreover, examination of the bacterial  
116 taxa reported in these studies reveal similar blood microbiota compositions across  
117 the different studies, whereby Proteobacteria dominate (relative abundance values  
118 typically ranging from 85%-90%), and Firmicutes, Actinobacteria, and Bacteroidetes  
119 present to a lesser extent<sup>2,7,25,28</sup>. This suggests the existence of a core blood  
120 microbiome profile that persists independent of study environment or analytical  
121 methodology.

122  
123 **Using a range of complementary molecular and classical molecular biology**  
124 **techniques, here we characterise the human blood microbiome in unparalleled**  
125 **detail; at the DNA level, we amplify and sequence the 16S rRNA gene, at the**  
126 **RNA level, we assemble almost 500,000,000 unmapped mRNA reads and map**  
127 **these to known taxa, and finally, we present viability data from classical**  
128 **aerobic and anaerobic microbial culture experiments. Our experimental**  
129 **approach is detailed in Figure 1.**

130

131 **Materials and Methods**

132

133 **Donor Samples**

134 Atopic asthmatic individuals (n=5) with physician-diagnosed house dust mite allergy,  
135 and gender and age-matched healthy control subjects (n=5) were recruited to the  
136 study via SeraLabs Limited in accordance with the following criteria (**Table 1**). Whole  
137 blood was drawn, following alcohol cleansing of the skin surface, into EDTA  
138 containing tubes and stored on ice prior to centrifugation at 1000×g to obtain the  
139 plasma component. All samples were analysed anonymously, and the authors  
140 obtained ethical approval (Keele University ERP3) and written informed consent to  
141 utilise the samples for the research reported herein.

142

143 **Table 1 – Donor population characteristics**

144

| <b>Patient Criteria</b>                              |
|------------------------------------------------------|
| • Have a BMI < 30                                    |
| • Be non-smokers                                     |
| • Were diagnosed with atopic asthma during childhood |
| • Have severe/ poorly controlled symptoms            |
| • Are not on current oral steroid treatment          |
| • Must be allergic to house dust mite                |
| • Must not have diabetes, COPD, or hypertension      |

145

146

147 **DNA-level: Meta-taxonomic Characterisation**

148 The circulating microbiome was investigated at the DNA level by amplification and  
149 sequencing of the bacterial 16S ribosomal gene using oligonucleotide primers that  
150 target variable region 4<sup>29</sup> (**Table 2**). Direct amplification of the V4 region was  
151 performed using the Phusion Blood Direct kit (ThermoFisher scientific) alongside a  
152 negative control reaction (in which blood was replaced with molecular biology grade  
153 water) that underwent the complete experimental procedure. Amplification was  
154 performed in triplicate as 20µl reactions containing; 1.0 µl plasma, 10µl 2X Phusion  
155 blood PCR buffer, 0.4µl Phusion Blood II DNA polymerase, 1.0 µl of each forward  
156 and reverse oligonucleotide primer (10µM), and 6.6µl of UV-treated molecular  
157 biology grade water. Cycling parameters were as follows; an initial 5 minutes  
158 denaturation step at 98°C followed by 33 cycles of; denaturation (1 second at 98°C),  
159 annealing (5 seconds at 55°C), and extension (15 seconds at 72°C), and a final  
160 extension at 72°C for 7 minutes.

161

162 Amplicons resulting from triplicate reactions were combined and purified using the  
163 MinElute PCR purification kit (Qiagen) prior to a further 7 cycles of PCR using

164 AccuPrime Pfx SuperMix and a pair of V4 oligonucleotide primers we developed to  
165 incorporate the Illumina XT adapter in preparation for sequencing (**Table 2**). Cycling  
166 parameters were as follows; initial denaturation for 2 minutes at 95°C followed by 7  
167 cycles of; denaturation (15 seconds at 95°C), annealing (30 seconds at 55°C), and  
168 extension (25 seconds at 68°C), and a final extension at 68°C for 10 minutes. PCR  
169 products were purified using the AMPure XP magnetic beads (Agencourt) at a ratio  
170 of 0.8 beads to sample (v/v), eluted in 20µl molecular biology grade water, and  
171 quantified using the Qubit 3.0 high-sensitivity DNA kit. Amplicons were barcoded  
172 using the Nextera DNA library kit, multiplexed, and sequenced using the Illumina  
173 MiSeq system with a 250bp paired-end read metric. Bioinformatic analysis was  
174 performed using QIIME<sup>30</sup> implemented as part of the Nephel 16S paired-end QIIME  
175 pipeline using closed reference clustering against the SILVA database<sup>31</sup> at a  
176 sequence identity of 99%. All other parameters remained as default.

177

178 **Table 2** – Oligonucleotide primer sequences

| Primer Name | Sequence (5' – 3')                                         | Length |
|-------------|------------------------------------------------------------|--------|
| V4_F        | GTGCCAGCMGCCGCGGTAA                                        | 19     |
| V4_R        | GGACTACHVGGGTWTCTAAT                                       | 20     |
| V4_XT_F     | TCGTCGGCAGCGTCAGATGTGTATAAGAGACAGGTGCCAGCMGC<br>CGCGGTAA   | 52     |
| V4_XT_R     | GTCTCGTGGGCTCGGAGATGTGTATAAGAGACAGGGACTACHVG<br>GGTWTCTAAT | 54     |

179

180

### 181 **RNA-level: De-novo Assembly of Unmapped RNA Reads**

182 For the purposes of increasing our understanding of the molecular processes that  
183 are deregulated in patients with atopic asthma, we previously performed whole  
184 transcriptome sequencing on RNA extracted from each donor plasma sample (data  
185 currently unpublished). Here, we hypothesised that the non-mapping (likely non-  
186 human) reads that often result from such analyses would represent microbial  
187 community members that were present in the blood at the time of RNA extraction. To  
188 this end, RNA reads were mapped to the *Homo sapiens* genome version hg38 using  
189 Tophat with default parameters<sup>32</sup>. Reads failing to map to hg38 were identified from  
190 the resulting BAM file and reads, in fastq format, extracted using bedtools  
191 bamtofastq. In order to streamline our strategy, a single de novo transcriptome was  
192 produced by concatenating all of the unmapped reads produced from the entire  
193 study, and assembling these using Trinity<sup>33</sup> to form features representative of  
194 candidate non-human genes. To increase computational efficiency, the total read  
195 population was subsampled to a depth of 1M, 10M, 25M, and 100M, and the number  
196 of reads that these features explained computed by building a bowtie2 index out of  
197 each resulting transcriptome, and mapping the unmapped read population from each  
198 sample back to it. The transcriptome assembly with the highest mapping rate was  
199 used for further analysis as follows; (1) Abundance estimation – the transcriptome  
200 was indexed for bowtie2 and the number of reads mapping to each feature  
201 determined for each of our donor samples using RSEM<sup>34</sup>. (2) A matrix of expression  
202 values was produced using the abundance\_estimates\_to\_matrix.pl script packaged  
203 with Trinity<sup>35</sup>. (3) Statistical analysis - a differential expression analysis was  
204 conducted to identify candidate non-human genes that were significantly differentially  
205 expressed between the disease and disease-free donors using edgeR<sup>36</sup>. (4)

206 Identification - the taxonomic identity of each assembled feature was determined  
207 using Kraken<sup>37</sup> and visualised using Pavian<sup>38</sup>.

208 **Classical Culture: Bacterial Viability**

209 Classical microbiological culture, using a range of substrates, was carried out to  
210 determine whether the human plasma samples contained any viable bacterial cells,  
211 i.e. those capable of proliferation. For each sample, 250µl plasma was inoculated  
212 into 9ml of brain heart infusion broth and incubated for 5 days at 37°C. For each  
213 culture a negative control was generated, whereby 9ml of brain heart infusion broth  
214 was inoculated with 250µl of ultra-violet sterilised distilled water and incubated for 5  
215 days at 37°C. The inoculated broth was plated onto agar plates (Columbia agar + 5%  
216 horse blood; CLED medium; A.R.I.A + horse blood) and incubated under either  
217 aerobic (Columbia blood agar; CLED medium) or anaerobic (A.R.I.A agar) conditions  
218 at 37°C for a minimum of three days. Bacterial growth was evaluated by sight, and a  
219 selection of individual colonies from each plate were selected for identification by  
220 total 16S gene amplification and Sanger sequencing.

221

222

## 223 Results and Discussion

224

### 225 Donor Characteristics

226 The donor population were all female and all “never smokers”. The asthmatic  
227 population were 39.6 years in age (range 19 – 52) with a mean body mass index of  
228 24.4 (range 21.5 – 27.8) and all had physician-diagnosed atopic asthma resulting  
229 from house dust mite allergy. The control population were 39.4 years in age (range  
230 23 – 49) with a mean body mass index of 24.3 (range 21.0 – 26.4) and were  
231 disease-free. There were no statistically significant differences in age ( $P = 0.98$ ) or  
232 BMI ( $P = 0.93$ ) between the two groups (**Table 3**).

233

234 **Table 3 – Donor Population Characteristics**

| Donor      | Age (years) | BMI (kg/m <sup>2</sup> ) | Smoking History | Diagnosis          |
|------------|-------------|--------------------------|-----------------|--------------------|
| BRH1017873 | 50-60       | 27.8                     | Never           | Atopic Asthma, HDM |
| BRH1017874 | 30-40       | 27.3                     | Never           | Atopic Asthma, HDM |
| BRH1017875 | 40-50       | 23.3                     | Never           | Atopic Asthma, HDM |
| BRH1017876 | 10-20       | 21.5                     | Never           | Atopic Asthma, HDM |
| BRH1017877 | 40-50       | 22.3                     | Never           | Atopic Asthma, HDM |
| BRH1017878 | 40-50       | 26.4                     | Never           | Healthy            |
| BRH1017879 | 20-30       | 21                       | Never           | Healthy            |
| BRH1017880 | 40-50       | 26.4                     | Never           | Healthy            |
| BRH1017881 | 40-50       | 24.9                     | Never           | Healthy            |
| BRH1017882 | 30-40       | 22.7                     | Never           | Healthy            |

235

### 236 DNA-level Circulating Microbiome – Community Structure

237 The presence of bacterial DNA within the blood of our study cohort was evaluated by  
238 amplification and sequencing of the 16S RNA gene variable region 4. A negative  
239 experimental control sample mirrored our study samples through the entire  
240 experimental procedure downstream of venepuncture. This involved using ultra-  
241 violet treated distilled water in replacement of human blood during PCR amplification  
242 of the 16S rRNA V4 region. The negative control PCR product was then submitted to  
243 all downstream applications that the human blood underwent. This included bead-  
244 based purification of the 16S rRNA V4 amplicons, agarose gel electrophoresis, XT-  
245 tagging, library preparation and sequencing of the 16S rRNA V4 amplicons. Despite  
246 this control reaction being PCR-negative, it was nevertheless submitted for  
247 sequencing.

248

249 Using QIIME<sup>30</sup> implemented as part of Nephele, a total of 243, 853 sequencing reads  
250 from the amplified V4 region passed quality assessment (mean = 24,385 reads per  
251 sample; range = 10, 742 – 35, 701 reads). The results of our taxonomic classification  
252 are shown in (**Figure 2 A-D**) at the phylum and genus levels.

253

254 Our negative control reaction generated a small number of reads that were identified  
255 as the following genera; *Halomonas* (6 reads), *Corynebacterium* (64),  
256 *Staphylococcus* (24), *Ralstonia* (1726), *Stenotrophomonas* (460), *Pseudomonas*

257 (276), *Escherichia-Shigella* (2420) and *Ruminococcus* (405), but was  
258 overwhelmingly composed of reads mapping to the genus *Serratia* (18000). These  
259 genera have been reported previously as contaminants of next generation  
260 sequencing experiments<sup>39,40</sup> but importantly here, were either distinct from the taxa  
261 identified within our samples, or present at much lower levels.

262

263 At the phylum level, the blood microbiome was predominated by Proteobacteria  
264 (88% of all bacterial DNA in the control population, and 80.9% in the asthmatic  
265 population) followed by Actinobacteria (control = 7.8%, asthmatic = 7.1%),  
266 Firmicutes (control = 3.5%, asthmatic = 9.2%) and Bacteroidetes (control = 0.1%,  
267 asthmatic = 2.2%). These findings mirror previous studies<sup>2,7,25,28</sup> and further support  
268 the notion of a core blood microbiome predominated by four key phyla.

269

270 At the genus level, our blood samples were predominated by the genus  
271 *Achromobacter*<sup>41</sup> which accounted for 51.1% and 45.3% of the total bacterial DNA  
272 detected in the control and asthma donors respectively. To a lesser extent, the blood  
273 samples also comprised members of the *Pseudomonas* (12.8%, 7.5%)<sup>7,9,18</sup>,  
274 *Serratia*\* (0.9%, 11.6%)<sup>42</sup>, *Sphingomonas* (3.8%, 5.1%)<sup>7,25</sup>, *Staphylococcus* (5.5%,  
275 2.8%)<sup>7,18,43,44</sup>, *Corynebacterium* (3.2%, 5.5%)<sup>7,9</sup>, and *Acinetobacter* (3.7%, 2.8%)<sup>7</sup>  
276 genera. The genus *Serratia* was excluded from further analysis as the study samples  
277 presented with less reads than did the corresponding negative control reaction and  
278 thus it was considered a contaminant.

279

280 Whilst all genera found have been previously described in the blood (see  
281 references), the predominance of *Achromobacter*, which is not classically associated  
282 with the blood microbiome, warrants further consideration. Indeed, *Achromobacter*  
283 has been detected abundantly in the lower respiratory tract of healthy mice<sup>45</sup>,  
284 humans (HPM airway dataset), and in various respiratory conditions<sup>46,47</sup>.  
285 Furthermore, no *Achromobacter* was detected in our experimental control reactions  
286 suggesting that its presence is not the result of experimental contamination.

287

288 Although differential composition of the blood microbiome in response to pathology  
289 was not the main focus of this study, we performed principal coordinates analysis  
290 and despite the relatively small sample set, this revealed good separation between  
291 the two treatment groups based upon their microbiome profile, suggesting that the  
292 blood microbiome community was altered in the asthmatic subjects (**Figure 3**).

293

294

## 295 **DNA-level Circulating Microbiome – Likely Origins**

296 In accordance with our hypothesis that the blood microbiome exists as a  
297 consequence of bacterial translocation from other microbiome niches within the  
298 body, we compared the data generated herein with gastrointestinal tract, oral cavity,  
299 and skin data made available by the Human Microbiome Project (HMP). In each  
300 case, the HMP data and our own were combined, weighted UniFrac distances  
301 calculated, and a principal coordinates analysis performed. **Figure 4** demonstrates  
302 that the blood microbiome of our control and asthmatic donors clustered more  
303 closely in PCoA space with the oral cavity and skin HMP data, than it did with the  
304 gastrointestinal tract HMP data. This suggests that the blood microbiome community



305 is perhaps more likely to result from the translocation of organisms from the oral  
306 cavity and skin, than from organisms that colonise the gastrointestinal tract.

307

308 Various daily activities including chewing, tooth brushing and flossing have been  
309 shown to result in the translocation of bacteria from the oral cavity into the  
310 bloodstream<sup>19-22</sup>. Further, the skin has a distinct microbial community and is  
311 susceptible to injury, and thus represents a large surface area through which such  
312 organisms may translocate to the bloodstream. It is important here to consider  
313 sources of contamination; venepuncture, the process through which the majority of  
314 blood samples are obtained, is recognised as a cause of transient bacteraemia<sup>48</sup>,  
315 and despite the use of preventative measures such as alcohol cleansing of the skin  
316 prior to breaking the surface, there remains the possibility that organisms entered the  
317 sample from the skin via this route.

318

319 One important, but often overlooked limitation of DNA-based microbiome  
320 characterisation is that DNA persists post-mortem, even in the presence of harsh  
321 environmental conditions. From such analyses it is therefore impossible to confirm  
322 whether an organism is present and viable, is present but non-viable, or whether the  
323 organism has since left the environment in question yet it's DNA persists.

324

325

326

## 327 **RNA-level Circulating Microbiome – Community Structure**

328 We hypothesise that some of the non-mapping (likely non-human) reads that often  
329 result from whole transcriptome analyses (RNA-seq) represent microbial community  
330 members that were present (or parts thereof) in the blood at the time of RNA  
331 extraction. Furthermore, given the unstable nature of extracellular circulatory RNA<sup>49</sup>  
332 in addition to the presence of circulatory ribonucleases that actively degrade RNA<sup>47</sup>,  
333 , we suggest that the detection of bacterial RNA goes further towards confirming the  
334 recent presence of these microbes within the blood when compared with DNA-based  
335 approaches. From our previous studies of the circulating transcriptome of our donor  
336 community, a total of 439,448,931 paired RNA reads failed to map to the human  
337 genome. These reads were used for the following analyses as randomly subsampled  
338 populations of 1 million, 10 million, 25 million and 100 million read pairs. Mapping the  
339 total read population back to the subsampled populations allowed us to assess how  
340 well each subsampled population approximated the starting (entire, ~ 440M read)  
341 population. Data revealed only marginal improvements in whole community  
342 representation as the subsampled population increased (1M, 10M, 25M, 100M  
343 represented 65.05, 66.05, 66.81, 64.24% of the total read population). A subsampled  
344 population of 25 million reads (25M) provided an acceptable balance between read  
345 representation and computational efficiency and was therefore used for  
346 transcriptome assembly. The transcriptome comprised 2050 candidate “non-human  
347 genes” with a mean GC content of 53%. Ten-percent of these genes were greater  
348 than 517bp, and over half were at least 263bp. Taxonomic identification of each  
349 assembled feature was determined using Kraken<sup>37</sup> and this revealed that 729 of the  
350 2050 features were of bacterial origin and 7 features were from archaea (pertaining  
351 to the taxa Thermoplasmata, which has been previously associated with the human  
352 microbiome<sup>50</sup>) (**Figure 5**). Although we identified 13 features of apparent viral origin,  
353 we did not consider these in any further detail given they appeared to pertain to the

354 Moloney murine leukemia virus, a commonly utilised reverse transcriptase used in  
355 molecular procedures. It should be noted that the Kraken database does not include  
356 fungi, and therefore this kingdom was not represented within our data.

357 At the phylum level, the whole transcriptome data was predominated by assembled  
358 Proteobacteria sequences (379 sequences, 52%), followed by Firmicutes (143,  
359 19.8%), Actinobacteria (112, 15.5%) and Bacteroidetes (35, 4.8%). In considering  
360 the total number of reads mapping to each feature, 379.4M reads mapped to  
361 bacterial features (out of a total of 395M reads). Of those reads mapping to bacterial-  
362 derived sequences, Proteobacteria (74.9%, 47.0%; Control, Asthma) and Firmicutes  
363 (19.5%, 48.0%) predominated with, Actinobacteria (0.01%, 0.04%) and  
364 Bacteroidetes (0.05%, 0.008%) present to a much lesser extent. These findings  
365 support our DNA-level phylum data and mirror previous studies<sup>2,7,25,28</sup>.

366  
367 At the genus level, the whole transcriptome data was predominated by the genera  
368 *Paenibacillus* (17.8%, 44.6%; Control, Asthma reads)<sup>51</sup>, *Escherichia* (11.8%, 13.1%)  
369 <sup>7,9,43,52</sup>, *Acinetobacter* (0.7%, 0.4%)<sup>7</sup>, *Pseudomonas* (0.8%, 0.1%)<sup>7,9,18,53</sup> and  
370 *Propionibacterium* (0.5%, 0.2%)<sup>9,18,44,53</sup>. With the exception of *Paenibacillus*, all  
371 genera detected via *de novo* transcriptome assembly were also present in our DNA-  
372 level data and all genera found have been previously described in the blood (see  
373 references). The fact that *Paenibacillus* was present within our RNA-level analyses  
374 yet absent from our DNA-level data led us to consider whether it could have been  
375 introduced as a contaminant during the RNA extraction, library preparation or  
376 sequencing procedures. Given that negative control reactions are not routinely  
377 conducted for RNA-seq type applications, we were unable to experimentally confirm  
378 this. However, we did identify from the literature that this genus has been reported as  
379 a common reagent and laboratory contaminant, albeit at the DNA level<sup>40</sup>.  
380 Nevertheless there appeared to be little consistency in its presence within our  
381 sample set (mean % of reads  $39.5 \pm 40.3\%$ ) and we noted a difference in abundance  
382 between our experimental groups despite all preparation procedures being the  
383 same. The exact source of this RNA thus remains open to speculation.

384  
385

### 386 **Classical Culture – Presence of Viable Organisms**

387 The presence of viable, proliferating bacteria in the blood was assessed using  
388 growth culture assays as previously described. Bacterial cultures were positive for  
389 80% of blood samples assayed (8 out of 10 samples; 4 control blood samples and 4  
390 asthma blood samples), whilst all negative control plates had no growth as expected.  
391 These results are relatively consistent with previous studies, whereby 2-100% of  
392 blood samples were positive for bacterial growth<sup>18,54-57</sup>. Unexpectedly, bacterial  
393 growth was observed in aerobic conditions for all culture-positive blood samples, but  
394 anaerobic growth was only observed for four of the culture-positive blood samples.  
395 This is contradictory to previous studies, where bacterial growth from blood-cultures  
396 has predominately been achieved using anaerobic conditions<sup>18,55</sup>.

397  
398  
399  
400  
401  
402

In all instances, bacterial growth was monoculture on microscopy and thus 16S  
colony PCR (amplifying the entire 16S rRNA gene) and Sanger sequencing was  
conducted on a three independent colonies per plate for identification purposes.  
Bacteria were identified using Sanger sequencing followed by classification with  
Kraken. Bacteria isolated from the aerobic cultures included the following genera;

403 *Staphylococcus* (49 sequences), *Micrococcus* (12), *Kocuria* (6), *Corynebacterium* (6)  
404 and *Propionibacterium* (1). Bacteria isolated from the anaerobic cultures were less  
405 variable and included members from the facultatively anaerobic *Staphylococcus*  
406 genus only (**Figure 6**). These genera belong to the phyla Actinobacteria  
407 (*Corynebacterium*, *Kocuria*, *Micrococcus*) and Firmicutes (*Staphylococcus*) and were  
408 all represented in our 16S DNA level data (**Figure 4**) and detected within our RNA  
409 data. Individual sample data is presented in (**Table 4**). It is noteworthy that, with the  
410 exception of *Kocuria*, all bacteria identified displayed some of the highest total  
411 relative abundance scores in the 16S sequencing results; *Corynebacterium* (4.2%),  
412 *Kocuria* (0.2%), *Micrococcus* (1.30%), and *Staphylococcus* at 4.3%. Due to the long-  
413 held belief that the bloodstream of healthy individuals is sterile and since the blood is  
414 an unfavourable compartment for the microbes due to its bacteriostatic and  
415 bactericidal components; here we consider the likely source of these viable  
416 organisms. The skin microbiome is dominated by members of the  
417 genera *Corynebacterium*, *Micrococcus*, *Staphylococcus*, and *Propionibacterium*,  
418 the proportions of which vary markedly between individuals <sup>58</sup>. Furthermore,  
419 several studies report the presence of the genus *Kocuria* on the skin of humans  
420 and other mammals <sup>59-61</sup>. We therefore suggest that the organisms detected  
421 through our microbial culture experiments most likely originate from the skin.  
422 Whilst transient bacteraemia due to a breach of the skin barrier is an accepted  
423 occurrence, one would expect such organisms to be rapidly targeted and removed  
424 by the immune system.

425  
426 We therefore suggest that the viable organisms detected through classical  
427 microbial culture analysis are the result of venepuncture contamination whereby  
428 organisms from the skin are drawn into the vacutainer, contaminating the sample.  
429 An alternative hypothesis suggests that these bacteria were present in the blood in  
430 a dormant state (i.e. not contaminants), and were somehow revived following pre-  
431 growth in brain heart infusion broth prior to plating (see Kell et al for a detailed  
432 description of this hypothesis <sup>8</sup>), however, this hypothesis is still under intense  
433 investigation.

434  
435

436  
437  
438

**Table 4** – Identification of cultured organisms using 16S colony PCR and Sanger Sequencing. Culture Neg denotes no bacterial growth on the substrates used.

| Growth Condition | Control Samples           |                           |                                                                                                           |                                    |             | Asthma Samples                     |             |                                     |                                   |
|------------------|---------------------------|---------------------------|-----------------------------------------------------------------------------------------------------------|------------------------------------|-------------|------------------------------------|-------------|-------------------------------------|-----------------------------------|
|                  | BRH1017878                | BRH1017879                | BRH1017880                                                                                                | BRH1017881                         | BRH1017882  | BRH1017874                         | BRH1017875  | BRH1017876                          | BRH1017877                        |
| Aerobic Growth   | <i>Kocuria rhizophila</i> | <i>Micrococcus luteus</i> | <i>Staphylococcus haemolyticus</i><br><i>Staphylococcus epidermidis</i><br><i>Propionibacterium acnes</i> | <i>Staphylococcus haemolyticus</i> | Culture Neg | <i>Staphylococcus haemolyticus</i> | Culture Neg | <i>Corynebacterium halotolerans</i> | <i>Staphylococcus epidermidis</i> |
| Anaerobic Growth | Culture Neg               | Culture Neg               | <i>Staphylococcus epidermidis</i>                                                                         | <i>Staphylococcus hominis</i>      | Culture Neg | Culture Neg                        | Culture Neg | Culture Neg                         | <i>Staphylococcus epidermidis</i> |

439  
440  
441  
442  
443  
444  
445

## 446 **Concluding Remarks**

447

448 This study utilised a range of molecular and classical microbiology approaches to  
449 characterise the human blood microbiome in unparalleled detail. Our DNA and RNA-  
450 based studies revealed a diverse community of bacteria, the main members of which  
451 having been described in a range of other studies and therefore providing further  
452 evidence of a core blood microbiome. Although disease associated changes in the  
453 blood microbiome were not the focus of this study, the fact we identified such  
454 changes is encouraging and supports efforts to identify circulating microbiome  
455 signatures indicative of disease.

456

457 Whilst we attribute the finding of viable organisms in our plasma samples to  
458 venepuncture-associated contamination of the blood sample (and make  
459 recommendations to avoid this in future) and or the phenomena of dormancy, the  
460 presence of these viable organisms does not undermine our exciting molecular data  
461 that reports an abundance of bacteria-associated DNA and RNA within the blood,  
462 likely present due to translocation from classical microbiome niches (such as the gut,  
463 oral cavity and skin), and with the clear potential to be developed as a biomarker of  
464 microbiome status at distant anatomical sites.

465

466 On reflecting upon our experimental approach, we make the following  
467 recommendations for future studies;

468

469 (1) Significant attention should be paid to blood collection procedures as any  
470 contamination occurring at this stage impacts upon all downstream procedures. In  
471 addition to alcohol cleansing of the skin (as performed in this study), we recommend  
472 that the first volume drawn is diverted to a secondary tube, and analysed separately.  
473 This will allow investigation of the contribution that venepuncture-associated  
474 contamination makes, and allow robust analysis of the dormancy hypothesis.

475

476 (2) The inclusion of negative control reactions that are subject to the whole range of  
477 experimental procedures, including library preparation and sequencing, is absolutely  
478 essential.

479

480 (3) Where possible, RNA-seq studies used for unmapped read assembly should  
481 include negative control samples that are subject to all of the experimental  
482 procedures alongside the study samples. This will allow an appraisal of how  
483 significant reagent / laboratory procedure contamination is in these studies. Often the  
484 use of RNA-seq derived unmapped reads for microbiome characterisation is a  
485 "secondary use", and this is simply not possible.

486

487 (4) Seminal studies are still required to satisfactorily investigate the phenomenon of  
488 bacterial translocation from well-characterised microbiome niches to the blood.

489

490

491

492 **Acknowledgements**

493 This study used the Nephele platform from the National Institute of Allergy and  
494 Infectious Diseases (NIAID) Office of Cyber Infrastructure and Computational  
495 Biology (OCICB) in Bethesda, MD. This article was published as a pre-print with the  
496 following DOI: <https://doi.org/10.1101/359760><sup>62</sup>

497

498

499 **Data Availability**

500 The sequencing data utilised in this project can be found in the Sequence Read  
501 Archive, NIH, under the identifier SUB4654957.

502

## 503 References

504

- 505 1 Markova, N. D. L-form bacteria cohabitants in human blood: significance for health and  
506 diseases. *Discov Med* **23**, 305-313 (2017).
- 507 2 Amar, J. *et al.* Blood microbiota dysbiosis is associated with the onset of cardiovascular  
508 events in a large general population: the D.E.S.I.R. study. *PLoS One* **8**, e54461,  
509 doi:10.1371/journal.pone.0054461 (2013).
- 510 3 Bhattacharyya, M., Ghosh, T., Shankar, S. & Tomar, N. The conserved phylogeny of blood  
511 microbiome. *Mol Phylogenet Evol* **109**, 404-408, doi:10.1016/j.ympev.2017.02.001 (2017).
- 512 4 Kell, D. B. & Pretorius, E. On the translocation of bacteria and their lipopolysaccharides  
513 between blood and peripheral locations in chronic, inflammatory diseases: the central roles  
514 of LPS and LPS-induced cell death. *Integr Biol (Camb)* **7**, 1339-1377, doi:10.1039/c5ib00158g  
515 (2015).
- 516 5 Li, Q. *et al.* Identification and Characterization of Blood and Neutrophil-Associated  
517 Microbiomes in Patients with Severe Acute Pancreatitis Using Next-Generation Sequencing.  
518 *Front Cell Infect Microbiol* **8**, 5, doi:10.3389/fcimb.2018.00005 (2018).
- 519 6 Mangul, S. *et al.* Total RNA Sequencing reveals microbial communities in human blood and  
520 disease specific effects. *bioRxiv*, doi:10.1101/057570 (2016).
- 521 7 Païssé, S. *et al.* Comprehensive description of blood microbiome from healthy donors  
522 assessed by 16S targeted metagenomic sequencing. *Transfusion* **56**, 1138-1147,  
523 doi:10.1111/trf.13477 (2016).
- 524 8 Potgieter, M., Bester, J., Kell, D. B. & Pretorius, E. The dormant blood microbiome in chronic,  
525 inflammatory diseases. *FEMS Microbiol Rev* **39**, 567-591, doi:10.1093/femsre/fuv013 (2015).
- 526 9 Dinakaran, V. *et al.* Elevated levels of circulating DNA in cardiovascular disease patients:  
527 metagenomic profiling of microbiome in the circulation. *PLoS One* **9**, e105221,  
528 doi:10.1371/journal.pone.0105221 (2014).
- 529 10 Rajendhran, J., Shankar, M., Dinakaran, V., Rathinavel, A. & Gunasekaran, P. Contrasting  
530 circulating microbiome in cardiovascular disease patients and healthy individuals. *Int J*  
531 *Cardiol* **168**, 5118-5120, doi:10.1016/j.ijcard.2013.07.232 (2013).
- 532 11 Nikkari, S., McLaughlin, I. J., Bi, W., Dodge, D. E. & Relman, D. A. Does blood of healthy  
533 subjects contain bacterial ribosomal DNA? *J Clin Microbiol* **39**, 1956-1959,  
534 doi:10.1128/JCM.39.5.1956-1959.2001 (2001).
- 535 12 Vientós-Plotts, A. I. *et al.* Dynamic changes of the respiratory microbiota and its relationship  
536 to fecal and blood microbiota in healthy young cats. *PLoS One* **12**, e0173818,  
537 doi:10.1371/journal.pone.0173818 (2017).
- 538 13 Mandal, R. K. *et al.* An investigation into blood microbiota and its potential association with  
539 Bacterial Chondronecrosis with Osteomyelitis (BCO) in Broilers. *Sci Rep* **6**, 25882,  
540 doi:10.1038/srep25882 (2016).
- 541 14 Sze, M. A. *et al.* Changes in the bacterial microbiota in gut, blood, and lungs following acute  
542 LPS instillation into mice lungs. *PLoS One* **9**, e111228, doi:10.1371/journal.pone.0111228  
543 (2014).
- 544 15 Jeon, S. J. *et al.* Blood as a route of transmission of uterine pathogens from the gut to the  
545 uterus in cows. *Microbiome* **5**, 109, doi:10.1186/s40168-017-0328-9 (2017).
- 546 16 Martel, J., Wu, C. Y., Huang, P. R., Cheng, W. Y. & Young, J. D. Pleomorphic bacteria-like  
547 structures in human blood represent non-living membrane vesicles and protein particles. *Sci*  
548 *Rep* **7**, 10650, doi:10.1038/s41598-017-10479-8 (2017).
- 549 17 McLaughlin, R. W. *et al.* Are there naturally occurring pleomorphic bacteria in the blood of  
550 healthy humans? *J Clin Microbiol* **40**, 4771-4775 (2002).
- 551 18 Damgaard, C. *et al.* Viable bacteria associated with red blood cells and plasma in freshly  
552 drawn blood donations. *PLoS One* **10**, e0120826, doi:10.1371/journal.pone.0120826 (2015).

- 553 19 Forner, L., Larsen, T., Kilian, M. & Holmstrup, P. Incidence of bacteremia after chewing, tooth  
554 brushing and scaling in individuals with periodontal inflammation. *J Clin Periodontol* **33**, 401-  
555 407, doi:10.1111/j.1600-051X.2006.00924.x (2006).
- 556 20 Horliana, A. C. *et al.* Dissemination of periodontal pathogens in the bloodstream after  
557 periodontal procedures: a systematic review. *PLoS One* **9**, e98271,  
558 doi:10.1371/journal.pone.0098271 (2014).
- 559 21 Parahitiyawa, N. B., Jin, L. J., Leung, W. K., Yam, W. C. & Samaranyake, L. P. Microbiology of  
560 odontogenic bacteremia: beyond endocarditis. *Clin Microbiol Rev* **22**, 46-64, Table of  
561 Contents, doi:10.1128/CMR.00028-08 (2009).
- 562 22 Lockhart, P. B. *et al.* Bacteremia associated with toothbrushing and dental extraction.  
563 *Circulation* **117**, 3118-3125, doi:10.1161/CIRCULATIONAHA.107.758524 (2008).
- 564 23 Ono, S. *et al.* Detection of microbial DNA in the blood of surgical patients for diagnosing  
565 bacterial translocation. *World J Surg* **29**, 535-539, doi:10.1007/s00268-004-7618-7 (2005).
- 566 24 Sato, J. *et al.* Gut dysbiosis and detection of "live gut bacteria" in blood of Japanese patients  
567 with type 2 diabetes. *Diabetes Care* **37**, 2343-2350, doi:10.2337/dc13-2817 (2014).
- 568 25 Lelouvier, B. *et al.* Changes in blood microbiota profiles associated with liver fibrosis in obese  
569 patients: A pilot analysis. *Hepatology* **64**, 2015-2027, doi:10.1002/hep.28829 (2016).
- 570 26 Lehtiniemi, J., Karhunen, P. J., Goebeler, S., Nikkari, S. & Nikkari, S. T. Identification of  
571 different bacterial DNAs in human coronary arteries. *Eur J Clin Invest* **35**, 13-16,  
572 doi:10.1111/j.1365-2362.2005.01440.x (2005).
- 573 27 Ling, Z. *et al.* Blood microbiota as a potential noninvasive diagnostic biomarker for liver  
574 fibrosis in severely obese patients: Choose carefully. *Hepatology* **65**, 1775-1776,  
575 doi:10.1002/hep.28987 (2017).
- 576 28 Olde Loohuis, L. M. *et al.* Transcriptome analysis in whole blood reveals increased microbial  
577 diversity in schizophrenia. *Transl Psychiatry* **8**, 96, doi:10.1038/s41398-018-0107-9 (2018).
- 578 29 Kozich, J. J., Westcott, S. L., Baxter, N. T., Highlander, S. K. & Schloss, P. D. Development of a  
579 dual-index sequencing strategy and curation pipeline for analyzing amplicon sequence data  
580 on the MiSeq Illumina sequencing platform. *Appl Environ Microbiol* **79**, 5112-5120,  
581 doi:10.1128/AEM.01043-13 (2013).
- 582 30 Caporaso, J. G. *et al.* QIIME allows analysis of high-throughput community sequencing data.  
583 *Nat Methods* **7**, 335-336, doi:10.1038/nmeth.f.303 (2010).
- 584 31 Quast, C. *et al.* The SILVA ribosomal RNA gene database project: improved data processing  
585 and web-based tools. *Nucleic Acids Res* **41**, D590-596, doi:10.1093/nar/gks1219 (2013).
- 586 32 Trapnell, C. *et al.* Differential gene and transcript expression analysis of RNA-seq  
587 experiments with TopHat and Cufflinks. *Nat Protoc* **7**, 562-578, doi:10.1038/nprot.2012.016  
588 (2012).
- 589 33 Haas, B. J. *et al.* De novo transcript sequence reconstruction from RNA-seq using the Trinity  
590 platform for reference generation and analysis. *Nat Protoc* **8**, 1494-1512,  
591 doi:10.1038/nprot.2013.084 (2013).
- 592 34 Li, B. & Dewey, C. N. RSEM: accurate transcript quantification from RNA-Seq data with or  
593 without a reference genome. *BMC Bioinformatics* **12**, 323, doi:10.1186/1471-2105-12-323  
594 (2011).
- 595 35 Grabherr, M. G. *et al.* Full-length transcriptome assembly from RNA-Seq data without a  
596 reference genome. *Nat Biotechnol* **29**, 644-652, doi:10.1038/nbt.1883 (2011).
- 597 36 Robinson, M. D., McCarthy, D. J. & Smyth, G. K. edgeR: a Bioconductor package for  
598 differential expression analysis of digital gene expression data. *Bioinformatics* **26**, 139-140,  
599 doi:10.1093/bioinformatics/btp616 (2010).
- 600 37 Wood, D. E. & Salzberg, S. L. Kraken: ultrafast metagenomic sequence classification using  
601 exact alignments. *Genome Biol* **15**, R46, doi:10.1186/gb-2014-15-3-r46 (2014).
- 602 38 Breitwieser, F. P. & Salzberg, S. L. Pavian: Interactive analysis of metagenomics data for  
603 microbiomics and pathogen identification. *bioRxiv*, doi:10.1101/084715 (2016).



- 604 39 Laurence, M., Hatzis, C. & Brash, D. E. Common contaminants in next-generation sequencing  
605 that hinder discovery of low-abundance microbes. *PLoS One* **9**, e97876,  
606 doi:10.1371/journal.pone.0097876 (2014).
- 607 40 Salter, S. J. *et al.* Reagent and laboratory contamination can critically impact sequence-based  
608 microbiome analyses. *BMC Biol* **12**, 87, doi:10.1186/s12915-014-0087-z (2014).
- 609 41 Gyarmati, P. *et al.* Metagenomic analysis of bloodstream infections in patients with acute  
610 leukemia and therapy-induced neutropenia. *Sci Rep* **6**, 23532, doi:10.1038/srep23532  
611 (2016).
- 612 42 Moriyama, K. *et al.* Polymerase chain reaction detection of bacterial 16S rRNA gene in  
613 human blood. *Microbiol Immunol* **52**, 375-382, doi:10.1111/j.1348-0421.2008.00048.x  
614 (2008).
- 615 43 Such, J. *et al.* Detection and identification of bacterial DNA in patients with cirrhosis and  
616 culture-negative, nonneutrocytic ascites. *Hepatology* **36**, 135-141,  
617 doi:10.1053/jhep.2002.33715 (2002).
- 618 44 Marques da Silva, R., Lingsaas, P. S., Geiran, O., Tronstad, L. & Olsen, I. Multiple bacteria in  
619 aortic aneurysms. *J Vasc Surg* **38**, 1384-1389, doi:10.1016/S0741 (2003).
- 620 45 Singh, N., Vats, A., Sharma, A., Arora, A. & Kumar, A. The development of lower respiratory  
621 tract microbiome in mice. *Microbiome* **5**, 61, doi:10.1186/s40168-017-0277-3 (2017).
- 622 46 Hogan, D. A. *et al.* Analysis of Lung Microbiota in Bronchoalveolar Lavage, Protected Brush  
623 and Sputum Samples from Subjects with Mild-To-Moderate Cystic Fibrosis Lung Disease.  
624 *PLoS One* **11**, e0149998, doi:10.1371/journal.pone.0149998 (2016).
- 625 47 Segal, L. N., Rom, W. N. & Weiden, M. D. Lung microbiome for clinicians. New discoveries  
626 about bugs in healthy and diseased lungs. *Ann Am Thorac Soc* **11**, 108-116,  
627 doi:10.1513/AnnalsATS.201310-339FR (2014).
- 628 48 Depcik-Smith, N. D., Hay, S. N. & Brecher, M. E. Bacterial contamination of blood products:  
629 factors, options, and insights. *J Clin Apher* **16**, 192-201 (2001).
- 630 49 Tsui, N. B., Ng, E. K. & Lo, Y. M. Stability of endogenous and added RNA in blood specimens,  
631 serum, and plasma. *Clin Chem* **48**, 1647-1653 (2002).
- 632 50 Lurie-Weinberger, M. N. & Gophna, U. Archaea in and on the Human Body: Health  
633 Implications and Future Directions. *PLoS Pathog* **11**, e1004833,  
634 doi:10.1371/journal.ppat.1004833 (2015).
- 635 51 Sáez-Nieto, J. A. *et al.* spp. isolated from human and environmental samples in Spain:  
636 detection of 11 new species. *New Microbes New Infect* **19**, 19-27,  
637 doi:10.1016/j.nmni.2017.05.006 (2017).
- 638 52 Francés, R. *et al.* A sequential study of serum bacterial DNA in patients with advanced  
639 cirrhosis and ascites. *Hepatology* **39**, 484-491, doi:10.1002/hep.20055 (2004).
- 640 53 Bhatt, A. S. *et al.* In search of a candidate pathogen for giant cell arteritis: sequencing-based  
641 characterization of the giant cell arteritis microbiome. *Arthritis Rheumatol* **66**, 1939-1944,  
642 doi:10.1002/art.38631 (2014).
- 643 54 Domingue, G. J. & Schlegel, J. U. Novel bacterial structures in human blood: cultural  
644 isolation. *Infect Immun* **15**, 621-627 (1977).
- 645 55 Jiménez, E. *et al.* Isolation of commensal bacteria from umbilical cord blood of healthy  
646 neonates born by cesarean section. *Curr Microbiol* **51**, 270-274, doi:10.1007/s00284-005-  
647 0020-3 (2005).
- 648 56 Wilson, W. R., Van Scoy, R. E. & Washington, J. A. Incidence of Bacteremia in Adults Without  
649 Infection. *Journal of Clinical Microbiology* **2**, 94-95 (1975).
- 650 57 Panaiotov, S. Cultural Isolation and Characteristics of the Blood Microbiome of Healthy  
651 Individuals. *Scientific Research* **008**, 406-421 (2018).
- 652 58 Tett, A. *et al.* Unexplored diversity and strain-level structure of the skin microbiome  
653 associated with psoriasis. *NPJ Biofilms Microbiomes* **3**, 14, doi:10.1038/s41522-017-0022-5  
654 (2017).

- 655 59 Cosseau, C. *et al.* Proteobacteria from the human skin microbiota: Species-level diversity and  
656 hypotheses. *One Health* **2**, 33-41, doi:10.1016/j.onehlt.2016.02.002 (2016).
- 657 60 McIntyre, M. K., Peacock, T. J., Akers, K. S. & Burmeister, D. M. Initial Characterization of the  
658 Pig Skin Bacteriome and Its Effect on In Vitro Models of Wound Healing. *PLoS One* **11**,  
659 e0166176, doi:10.1371/journal.pone.0166176 (2016).
- 660 61 Grice, E. A. *et al.* A diversity profile of the human skin microbiota. *Genome Res* **18**, 1043-  
661 1050, doi:10.1101/gr.075549.107 (2008).
- 662 62 Whittle, E., Leonard, M., Harrison, R., Gant, T. & Tonge, D. Multi-Method Characterisation of  
663 the Human Circulating Microbiome. *BioRxiv*, doi:<https://doi.org/10.1101/359760> (2018).
- 664  
665

666 **Figure Legends**

667

668 **Figure 1** – Schematic representation of the multiple-method circulating microbiome  
669 characterisation approach implemented herein. NB: Biomarker and mechanistic data are not  
670 included within the scope of this publication and appear elsewhere.

671

672 **Figure 2** – Relative abundance of the most abundant taxa (>1%) as determined by  
673 amplification and sequencing of the 16S rRNA gene variable region 4. Data are mean  
674 abundance expressed as a percentage of the total bacterial sequence count. (A) Phylum-  
675 level data grouped by condition, (B) Genus-level data grouped by condition, (C) Phylum-  
676 level individual sample data, (D) Genus-level individual sample data.

677

678 **Figure 3** – Principal coordinates analysis of weighted unifracs distances for control (blue) and  
679 asthmatic (red) blood microbiome profiles. Each dot represents an individual sample, and  
680 the microbiome of samples that appear more closely together are more similar.

681

682 **Figure 4** – Principal coordinates analysis of weighted unifracs distances between variable  
683 region 4 16S sequencing data from our donors and the Human Microbiome Project (A) Gut,  
684 (B) Oral Cavity and (C) Skin data. Each dot represents an individual sample, and the  
685 microbiome of samples that appear more closely together are more similar. In each case,  
686 our control donor samples appear in blue, and our asthmatic donor samples appear in red.  
687 Further sample details are provided beneath each figure, and the number of datasets  
688 representing each anatomic location is provided in brackets.

689

690 **Figure 5** – Taxonomic classification of each feature assembled from unmapped RNA  
691 sequencing reads using Trinity and identified using Kraken. The numbers present by each  
692 taxonomic classification refer to the number of features classified as such (e.g. 379  
693 assembled features were identified as Proteobacteria). D – domain, P – phylum, F – family,  
694 G – genus, S – species.

695

696 **Figure 6** – Taxonomic classification of total 16S data generated by colony PCR and Sanger  
697 sequencing. The numbers present by each taxonomic classification indicate the number of  
698 colonies that were identified with that identity. D – domain, P – phylum, F – family, G –  
699 genus, S – species.

700

701
